# Supplementary material
Source: Research Square preprint supplement (doi:10.21203/rs.3.rs-10129253/v1)
Supplement: Supplementary file 1 [file d01f36f1ecba2786537434b6.docx]

Appendix A

Derivation of Effective Permeability of Throat-ij

To derive the effective permeability () of a clogged throat, we begin with the cross-sectional area of that throat denoted by . This throat consists of both open and clogged regions, with ​ and ​ representing the permeabilities of the open and clogged sections, respectively, as shown in Figure A.1. The total length of the throat is , with and ​ being the lengths of the open and clogged regions, respectively. The overall pressure drop across the throat is given by ​.


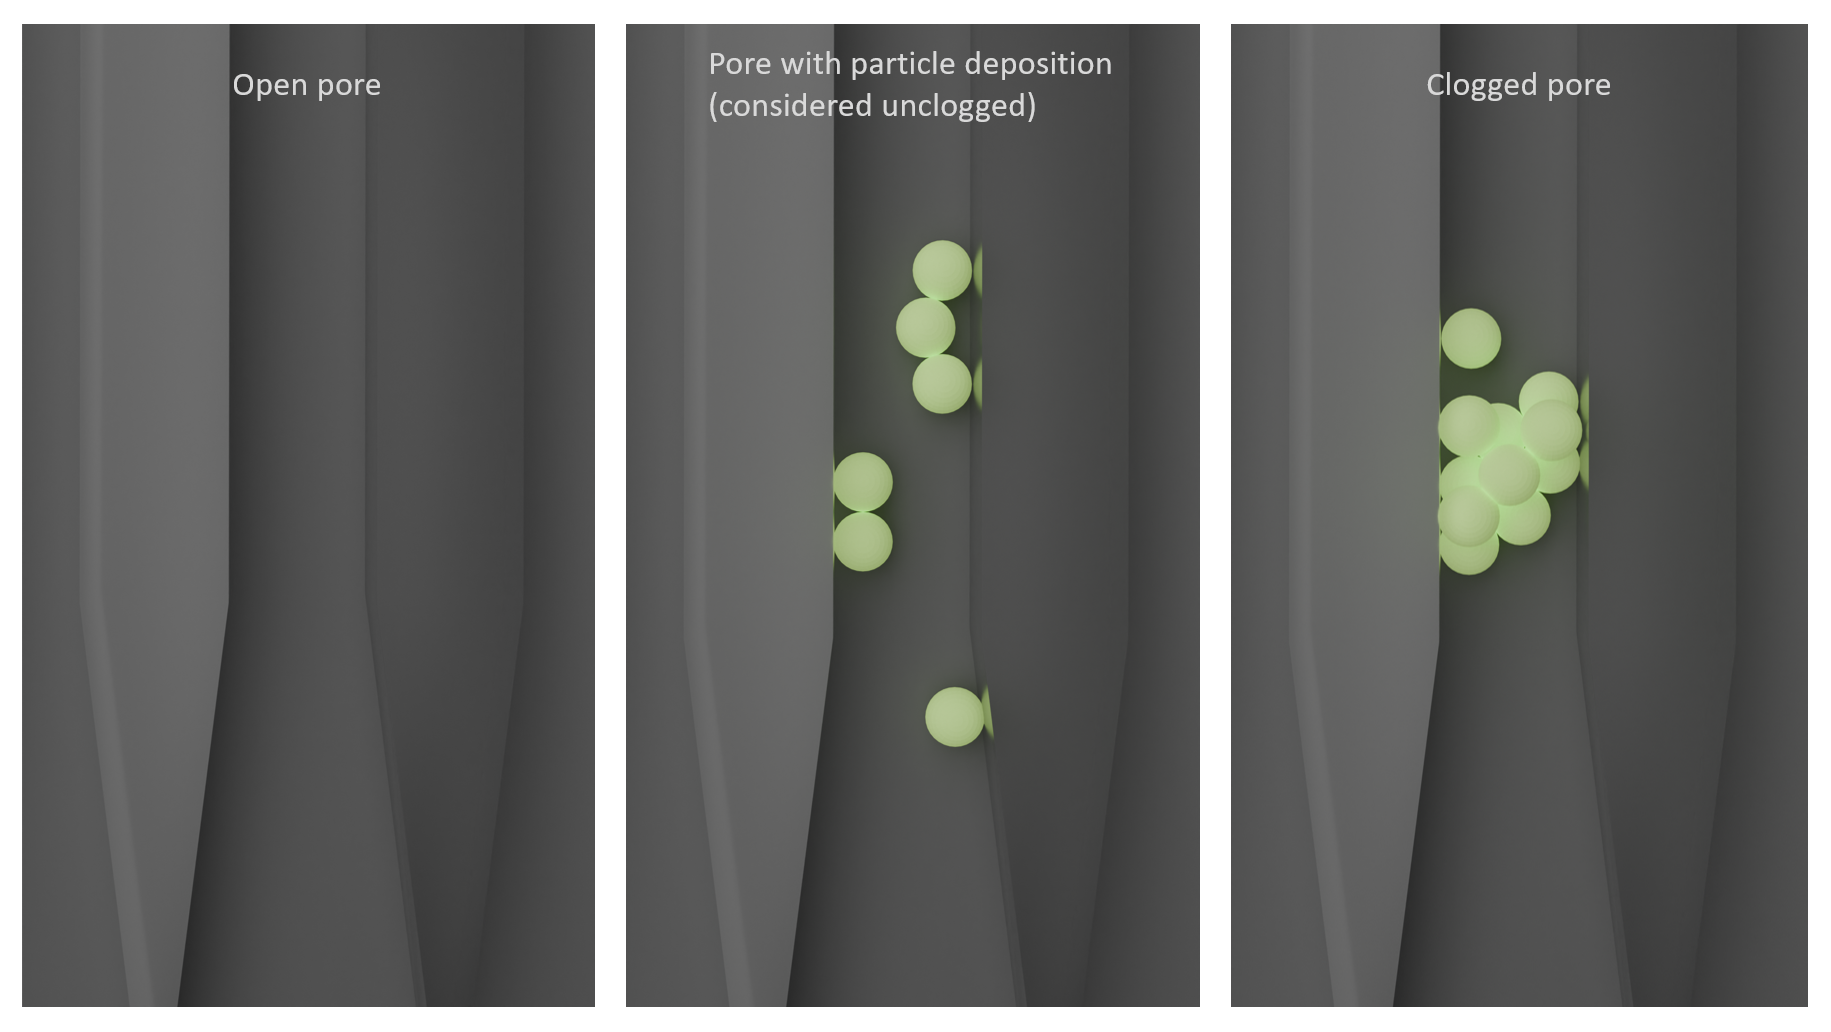

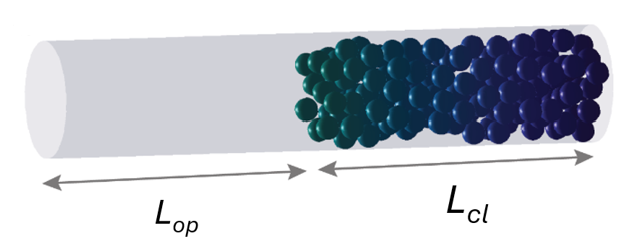


Figure A.1. The schematic of open and clogged pores and the underlying assumption that pores with deposited particles are considered unclogged as long as particles can still travel through.

### Derivation of:

According to the definition of permeability:

(A1)

Where is the volumetric flow rate through the throat and is the dynamic viscosity, both of which are considered constant here and is the cross-sectional area of the Throat.

Substituting with gives:

(A2)

Given that and , we can express and as:

(A3)

(A4)

Substituting and back into the equation for (A1) yields:

(A5)

This equation represents the total permeability of a throat clogged by particles, formulated as a harmonic average of the open and clogged sections, reflecting their series arrangement.
